# Supplementary material for: Profiles of Volatile and Phenolic Compounds as Markers of Ripening Stage in Candonga Strawberries
Source: MDPI journal article supplement (doi:10.3390/foods10123102), 2021-12-14
Supplement: s1 [file s1]

## Supplementary File:

**Table S1.** Volatile metabolites detected in cv “Sabrosa” strawberries and their identification codes.

| Metabolite                            | Code | RI <sup>t</sup> /RI <sup>sp</sup> | ID      | Metabolite                 | Code | RI <sup>t</sup> /RI <sup>sp</sup> | ID      |
|---------------------------------------|------|-----------------------------------|---------|----------------------------|------|-----------------------------------|---------|
| <b>Esters</b>                         |      |                                   |         | <b>Aldehydes</b>           |      |                                   |         |
| Methyl propionate                     | E1   | 872/872                           | RI/MS/S | Hexanal                    | Ad11 | 1084/1084                         | RI/MS/S |
| Methyl butyrate                       | E2   | 989/989                           | RI/MS/S | 2-Hexenal                  | Ald2 | 1242/1242                         | RI/MS/S |
| Methyl isovalerate                    | E3   | 1021/1022                         | RI/MS/S | Nonanal                    | Ald3 | 1404/1404                         | RI/MS/S |
| Ethyl butyrate                        | E4   | 1037/1037                         | RI/MS/S | Benzaldehyde               | Ald4 | 1533/1533                         | RI/MS/S |
| Isopropyl butyrate                    | E5   | 1042/1042                         | RI/MS/S | Dodecanal                  | Ald5 | 1716/1716                         | RI/MS/S |
| Butyl acetate                         | E6   | 1074/1075                         | RI/MS/S | <b>Alcohols</b>            |      |                                   |         |
| Methyl pentanoate                     | E7   | 1087/1087                         | RI/MS/S | 1-Hexanol                  | Al1  | 1365/1365                         | RI/MS/S |
| Ethyl pentanoate                      | E8   | 1121/1122                         | RI/MS/S | <i>trans</i> -3-Hexen-1-ol | Al2  | 1375/1376                         | RI/MS/S |
| Methyl hexanoate                      | E9   | 1204/1204                         | RI/MS/S | <i>cis</i> -3-Hexen-1-ol   | Al3  | 1393/1394                         | RI/MS/S |
| Butyl butyrate                        | E10  | 1235/1232                         | RI/MS/S | <i>trans</i> -2-Hexen-1-ol | Al4  | 1416/1416                         | RI/MS/S |
| Ethyl hexanoate                       | E11  | 1249/1249                         | RI/MS/S | 1-Octanol                  | Al5  | 1561/1561                         | RI/MS/S |
| Isoamyl butyrate                      | E12  | 1277/1267                         | RI/MS/S | <b>Acids</b>               |      |                                   |         |
| Hexyl acetate                         | E13  | 1284/1285                         | RI/MS/S | Propanoic acid             | Ac1  | 1545/1545                         | RI/MS/S |
| Methyl 2-hexenoate                    | E14  | 1288/1284                         | RI/MS   | 2-Methylpropionic acid     | Ac2  | 1573/1573                         | RI/MS/S |
| <i>cis</i> -3-Hexen-1-ol acetate      | E15  | 1326/1326                         | RI/MS/S | Butyric acid               | Ac3  | 1631/1631                         | RI/MS/S |
| <i>trans</i> -2-Hexen-1-ol acetate    | E16  | 1344/1344                         | RI/MS/S | 2-Methylbutanoic acid      | Ac4  | 1676/1676                         | RI/MS/S |
| Methyl octanoate                      | E17  | 1396/1398                         | RI/MS/S | Hexanoic acid              | Ac5  | 1848/1848                         | RI/MS/S |
| <i>trans</i> -2-Hexen-1-ol propionate | E18  | 1400/1392                         | RI/MS   | Heptanoic acid             | Ac6  | 1952/1952                         | RI/MS/S |
| n-Hexyl isobutyrate                   | E19  | 1420/1353                         | RI/MS/S | Octanoic acid              | Ac7  | 2073/2073                         | RI/MS/S |
| <i>trans</i> -2-Hexenyl butyrate      | E20  | 1478/1476                         | RI/MS/S | Nonanoic acid              | Ac8  | 21762176                          | RI/MS/S |
| Methyl 3-(methylthio) propionate      | E21  | 1529/1525                         | RI/MS/S | Decanoic acid              | Ac9  | 2278/2278                         | RI/MS/S |
| Hexyl hexanoate                       | E22  | 1609/1608                         | RI/MS/S | <b>Terpenes</b>            |      |                                   |         |
| n-Octyl isobutyrate                   | E23  | 1548/1547                         | RI/MS/S | Linalool                   | T1   | 1553/1553                         | RI/MS/S |
| Octyl 2-methylbutyrate                | E24  | 1649/1635                         | RI/MS   | β-Farnesene                | T2   | 1667/1667                         | RI/MS   |
| Methyl 3-hydroxyhexanoate             | E25  | 1653/1641                         | RI/MS/S | α-Terpineol                | T3   | 1702/1690                         | RI/MS/S |
| Benzyl acetate                        | E26  | 1729/1731                         | RI/MS/S | β-Damascenone              | T4   | 1834/1835                         | RI/MS/S |
| <b>Furanones</b>                      |      |                                   |         | Nerolidol                  | T5   | 2055/2055                         | RI/MS/S |
| Mesifurane                            | F1   | 1592/1600                         | RI/MS/S | <b>Lactones</b>            |      |                                   |         |
| Furaneol                              | F2   | 2042/2042                         | RI/MS/S | γ-Octalactone              | L1   | 1919/1919                         | RI/MS/S |
| <i>trans</i> -γ-Jasmolactone          | F3   | 2188/2181                         | RI/MS   | γ-Decalactone              | L2   | 2158/2158                         | RI/MS/S |
| <b>Others</b>                         |      |                                   |         | γ-Dodecalactone            | L3   | 2387/2384                         | RI/MS/S |
| Acetophenone                          | O1   | 1658/1658                         | RI/MS/S |                            |      |                                   |         |

RI: Relative retention indices on polar column reported in literature by [www.pherobase.com](http://www.pherobase.com); [www.flavornet.org](http://www.flavornet.org); [www.ChemSpider.com](http://www.ChemSpider.com); [webbook.nist.gov](http://webbook.nist.gov); RI<sup>sp</sup>: Relative retention indices calculated against n-alkanes (C<sub>8</sub>–C<sub>40</sub>) on HP-Innowax column; ID: Identification method as indicated by the following: RI: Kovats retention index on a HP-Innowax column; MS: NIST and Wiley libraries spectra; S: co-injection with authentic standard compounds on the HP-Innowax column.
